# Supplementary material for: Distinct Gut Microbiota Induced by Different Fat-to-Sugar-Ratio High-Energy Diets Share Similar Pro-obesity Genetic and Metabolite Profiles in Prediabetic Mice
Source: PubMed Central journal article supplement (PMC6787563; doi:10.1128/msystems.00219-19), 2019-10-08
Supplement: mSystems.00219-19-sf006.pdf [file mSystems.00219-19-sf006.pdf]

HF enriched genes (red) Verified metabolites (yellow)

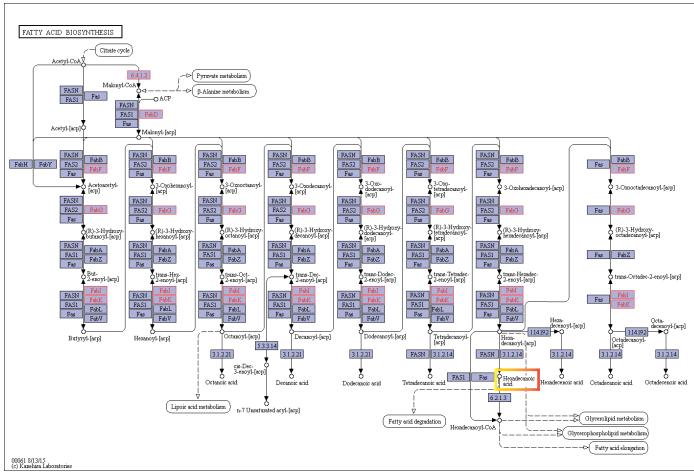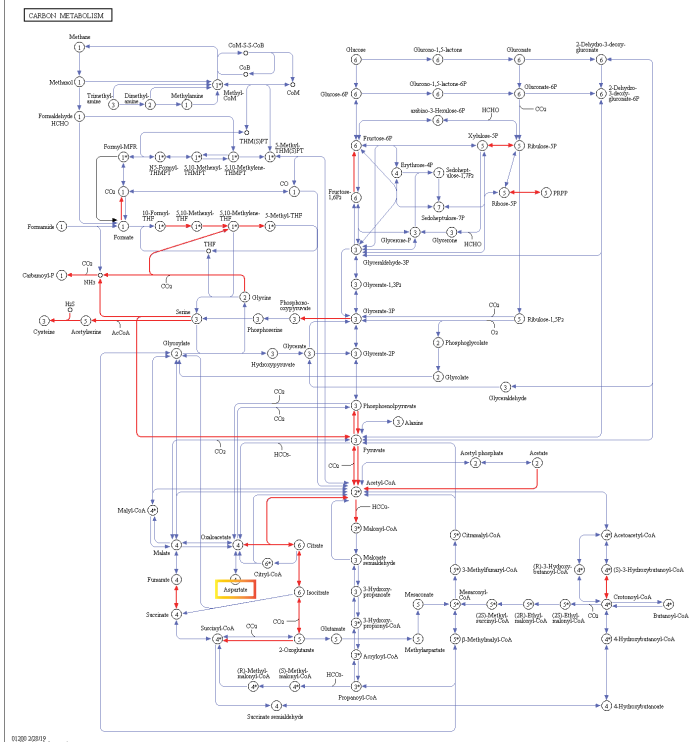

HS enriched genes

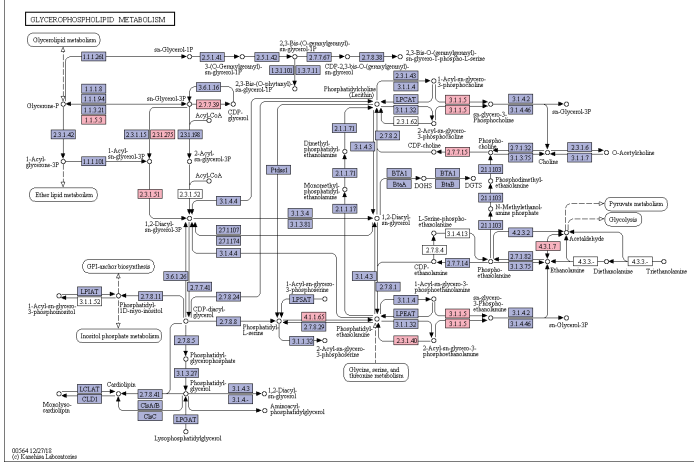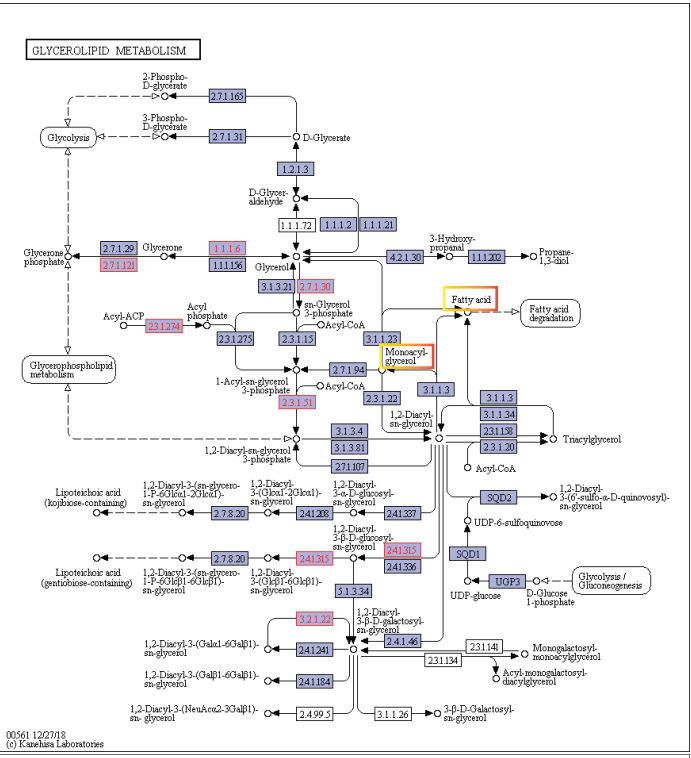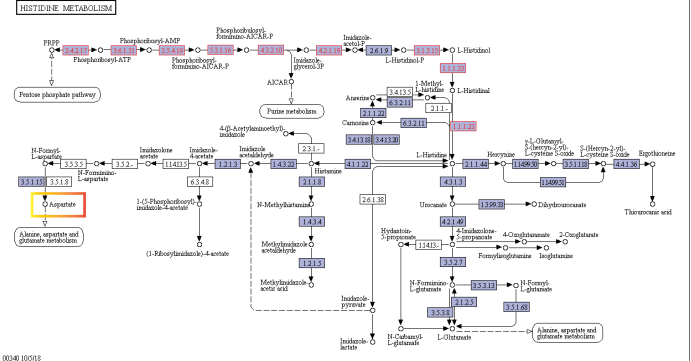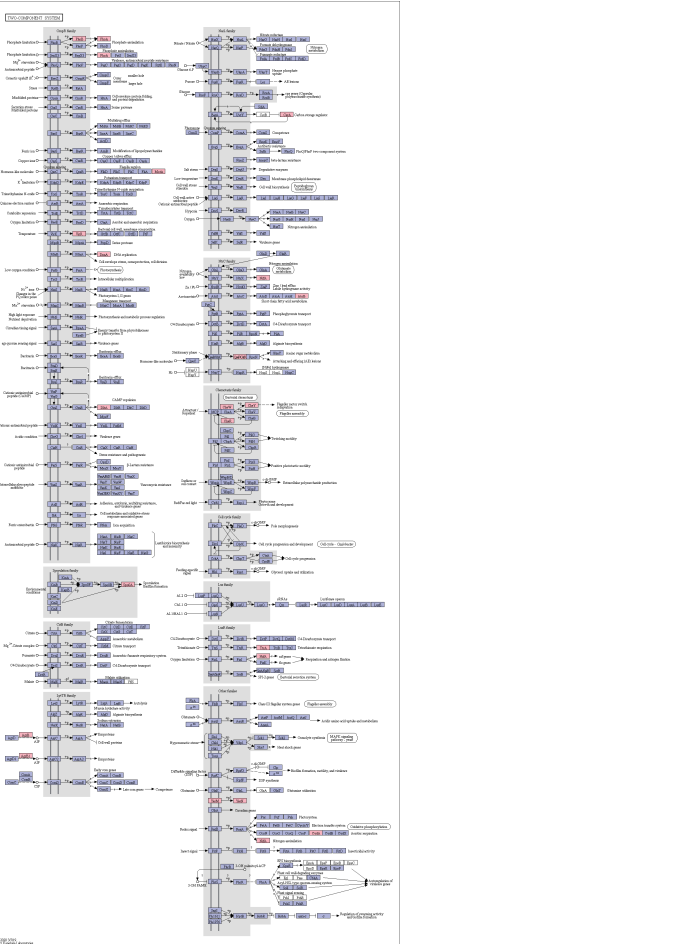

Figure S6
